**Diabetes is not a risk factor for myocardial infarction in patients without coronary artery disease**

C. Gyldenkerne<sup>1</sup>, K.K.W. Olesen<sup>1</sup>, P.G. Thrane<sup>1</sup>, M. Madsen<sup>2</sup>, T. Thim<sup>1</sup>, M. Wurtz<sup>3</sup>, L.O. Jensen<sup>4</sup>, B. Raungaard<sup>5</sup>, P.L. Poulsen<sup>6</sup>, H.E. Boetker<sup>1</sup>, M. Maeng<sup>1</sup>

<sup>1</sup>Aarhus University Hospital, Department of Cardiology, Aarhus, Denmark; <sup>2</sup>Aarhus University Hospital, Department of Clinical Epidemiology, Aarhus, Denmark; <sup>3</sup>Region Hospital Herning, Department of Cardiology, Herning, Denmark; <sup>4</sup>Odense University Hospital, Department of Cardiology, Odense, Denmark; <sup>5</sup>Aalborg University Hospital, Department of Cardiology, Aalborg, Denmark; <sup>6</sup>Aarhus University Hospital, Steno Diabetes Center, Aarhus, Denmark

**Funding Acknowledgement:** Type of funding source: Public hospital(s). Main funding source(s): The Department of Cardiology, Aarhus University Hospital, Aarhus, Denmark.

**Background:** Diabetes is considered a risk factor for myocardial infarction (MI). However, we have previously found that diabetes was not a short-term risk factor for MI in the absence of obstructive coronary artery disease (CAD).

**Purpose:** As long-term data are not available, we aimed to assess adverse cardiac events in patients with and without diabetes stratified by CAD up to 11 years after coronary angiography.

**Methods:** We conducted a cohort study of patients undergoing coronary angiography from 2003 to 2012 and followed them by cross-linking Danish health registries. Patients were stratified according to the presence/absence of CAD and diabetes. Outcomes included MI, cardiac death, all-cause death, and coronary revascularization.

**Results:** A total of 86,202 patients were included (diabetes: n=12,652).

Median follow-up was 8.8 years. Using patients with neither CAD nor diabetes as reference (cumulative MI incidence 2.6%), the risk of MI was similar for patients with diabetes alone (3.2%; hazard ratio 1.202, 95% CI: 0.996–1.451), was increased for patients with CAD alone (9.3%; hazard ratio 2.75, 95% CI: 2.52–3.01), and was highest for patients with both CAD and diabetes (12.3%; hazard ratio 3.79, 95% CI: 3.43–4.20), see Figure. Similar associations were observed for cardiac death and coronary revascularization.

**Conclusions:** Diabetes patients without CAD by coronary angiography have a similar risk of MI compared to patients with neither CAD nor diabetes. In the presence of CAD, however, diabetes increases the risk of MI.



Figure 1
